# Supplementary material for: Small molecule inhibitors reveal allosteric regulation of USP14 via steric blockade
Source: PubMed Central journal article supplement (PMC6274642; doi:10.1038/s41422-018-0091-x), 2018-09-25
Supplement: 41422_2018_91_MOESM3_ESM.pdf [file 41422_2018_91_MOESM3_ESM.pdf]

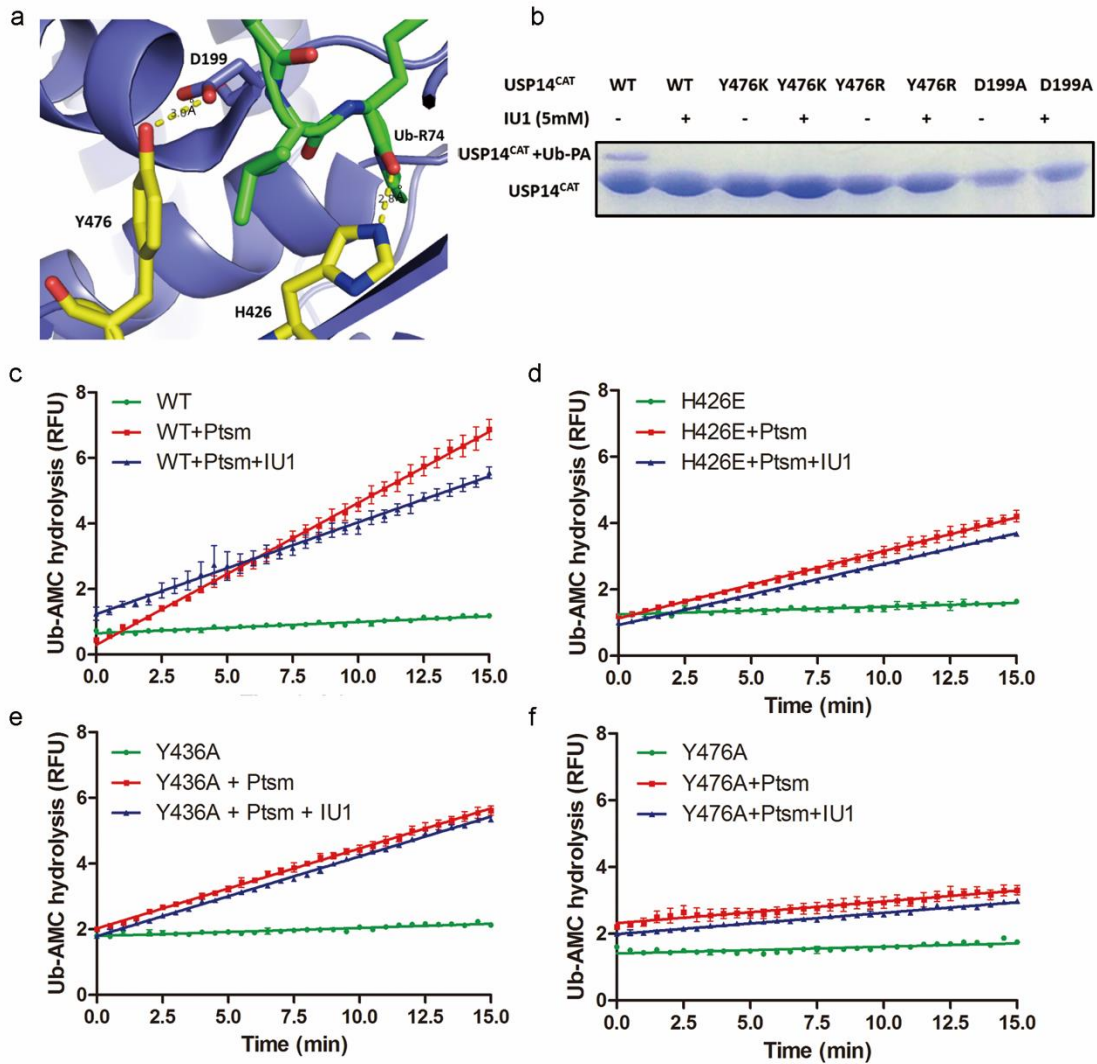

**Supplementary information, Fig. S3 Structural and biochemical analyses of the three key residues H426, Y436 and Y476 in IU1 binding.**

(a) H426 of USP14 forms a hydrogen bond with R74 of Ub, while Y476 forms a hydrogen bond with D199. (b) The Y476K, Y476R and D199A point mutations all abolish the formation of USP14/Ub-PA complex. The result was visualized by SDS-PAGE and Coomassie blue staining. (c-f) Linear kinetics of Ub-AMC hydrolysis by USP14 WT, H426E, Y436A and Y476A. All experiments contained 15 nM USP14 and 1 nM proteasome, and all the linear curves have  $R^2 > 0.99$ . Error bars represent SDs.
